# Supplementary material for: Examining the Predictors of Mental Ill Health in Esport Competitors
Source: MDPI journal article supplement (doi:10.3390/healthcare10040626), 2022-03-26
Supplement: s1 [file s1]

### **Supplementary material 1 (S1): Information about calculating stressor categories**

All stressors were subjected to factor reduction by conducting principal component analysis (see Table below), a data-led technique is used to maximize the variability and reduce the dimensionality of a dataset (e.g., Amieva et al., 2003; Bennett et al., 2005). A four-fold approach was followed as a method for appropriately interpreting PCA output: parallel analysis (Horn, 1965), Kaiser criterion ( $> 1$ ; Kaiser, 1960), inspection of Cattell's scree plots (Cattell, 1952) and the interpretability (Fabrigar et al., 1999). Orthogonal Varimax rotation was applied to the component matrix (Kaiser, 1958). Varimax rotation seeks to increase the variances of the factor loadings (i.e., factor loadings above 0.4 were considered significant) and the greater scores were maintained when cross-loading between components were present (Howard, 2016). Seven factors were extracted from the PCA with eigenvalues greater than one (see figure 1), latent variables were produced for each individual by regressing task scores onto the rotated component matrix.

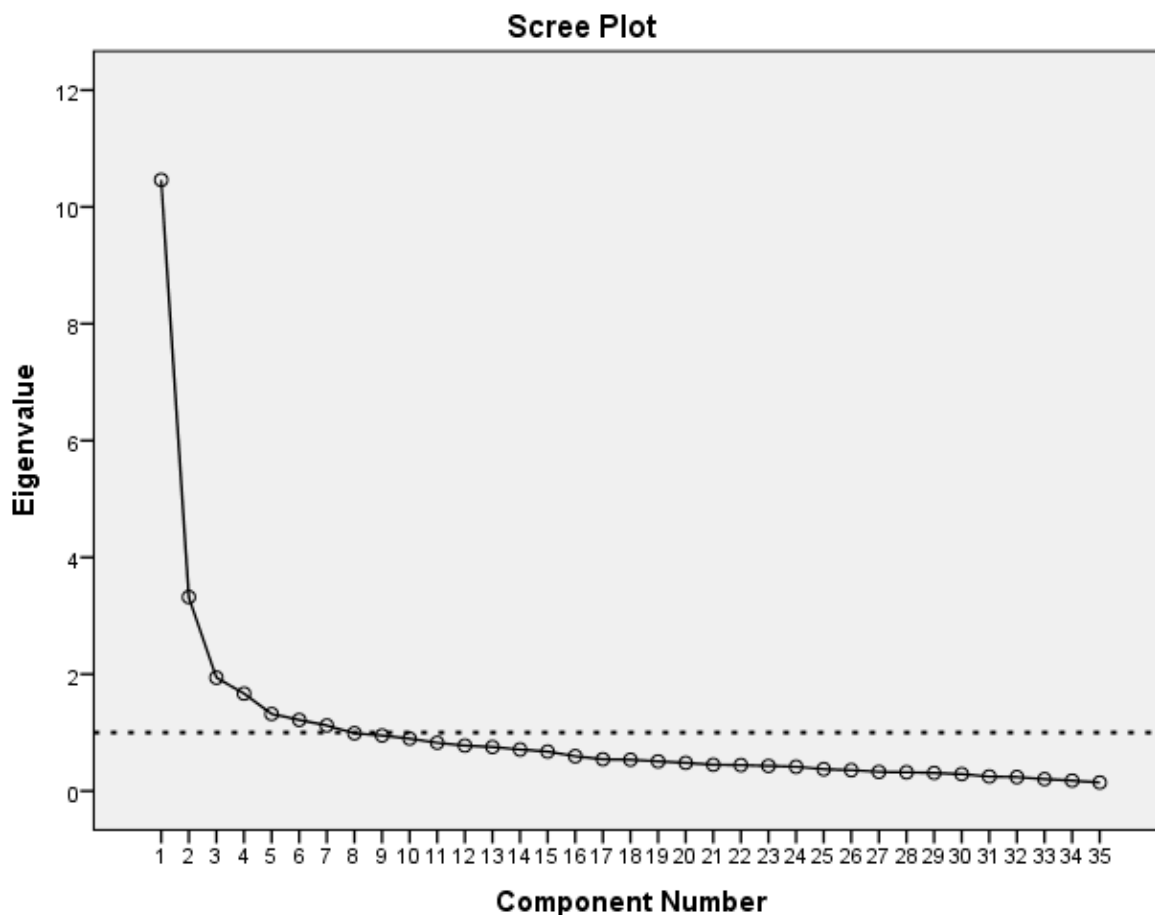

**Figure S1.** Scree plot produced through PCA, demonstrating 7-component solutions (eigenvalue  $> 1$ ), used for calculating individual latent stressor variables. Dotted line highlights eigenvalue cut-off (Kaiser, 1960).

**Table S1.** Rotated component loadings on all stressors.

| Stressors                                                 | Component |       |       |       |       |       |       |
|-----------------------------------------------------------|-----------|-------|-------|-------|-------|-------|-------|
|                                                           | 1         | 2     | 3     | 4     | 5     | 6     | 7     |
| Frustration from lack of in-game communication            | 0.751     |       |       |       |       |       |       |
| Teammates not listening to IGL (In Game Leader)           | 0.801     |       |       |       |       |       |       |
| Teammates not following instructions                      | 0.802     |       |       |       |       |       |       |
| Teammates valuing individual statistics over team success | 0.619     |       |       |       |       |       |       |
| Aggressive communication from IGL                         |           |       |       |       | 0.701 |       |       |
| Need to contribute to the team                            |           | 0.531 |       |       |       |       |       |
| Playing in the deciding round                             |           |       |       |       |       |       | 0.735 |
| Being on a run of bad form                                |           | 0.521 |       |       |       |       |       |
| Other players getting emotional                           |           |       |       |       | 0.661 |       |       |
| Lack of support from teammates                            | 0.484     |       |       |       |       |       |       |
| Lack of clarity on game plan                              | 0.401     |       |       |       |       |       |       |
| Knowing you're the last player on your team in the round  |           |       |       |       |       |       | 0.765 |
| Negative/critical communication from IGL                  |           |       |       |       | 0.691 |       |       |
| Worry that teammates will be affected by 'trash-talk'     |           |       |       |       | 0.308 |       |       |
| Teammates not putting in the practice time                |           |       | 0.814 |       |       |       |       |
| Losing a round you expected to win                        |           |       |       | 0.7   |       |       |       |
| When it gets close in a game                              |           |       |       |       |       |       | 0.53  |
| Losing a map you expected to win                          |           |       |       | 0.75  |       |       |       |
| Negative comments about IGL decisions                     |           |       |       |       |       | 0.554 |       |
| Controlling communication from IGL                        |           |       |       |       | 0.613 |       |       |
| Not knowing how break the other teams momentum            |           |       |       | 0.49  |       |       |       |
| Teammates not focussed in game                            | 0.534     |       |       |       |       |       |       |
| Worries about your skill level                            |           | 0.735 |       |       |       |       |       |
| Fear of failure                                           |           | 0.665 |       |       |       |       |       |
| Teammates not taking practice seriously                   |           |       | 0.777 |       |       |       |       |
| Certain maps you're not strong on                         |           |       |       | 0.449 |       |       |       |

|                                                                 |       |
|-----------------------------------------------------------------|-------|
| Having to have good statistics                                  | 0.688 |
| Worry about criticism and being dropped                         | 0.685 |
| Uncertainty over my own teams decision-making                   | 0.492 |
| Teammates' lack of practice hours                               | 0.803 |
| Organising practice and competition around other 'life' aspects | 0.384 |
| Trash talk from opposition when your team are losing/on-tilt    | 0.741 |
| Concern about your teammates' emotional stability               | 0.637 |

*Note.* Applied rotation method is varimax.

### **Organization and Labelling of Stressor Categories**

#### **PCA1) Teammate interactions** – Problems with interactions with teammates

- 1-Frustration from lack of in-game communication
- 2-Teammates not listening to IGL
- 3-Teammates not following instructions
- 4-Others valuing individual stats over team success
- 10-Lack of support from teammates
- 11-Lack of clarity on game plan
- 24-Teammates not focussed in game

#### **PCA2) Personal concerns** – concerns about your own individual contribution

- 6- Need to contribute to the team
- 8- Being on a run of bad form
- 25- Worries about their skill level
- 26-Fear of failure
- 29- Having to have good statistics (e.g., adapted from 'having to have a good average')
- 30-Worry about criticism and being dropped

#### **PCA3) Teammate concerns** – concerns about teammate contributions

- 3 - concern/lack of confidence in teammates
- 15- Players not putting in the practice time
- 27- Others not taking practice seriously
- 32- Teammates' lack of practice hours
- 33-Organising practice and competition around other 'life' aspects

**PCA4) Game-specific worry** – worry about aspects about the game.

- 18-Losing a round you expected to win
- 20-Losing a map you expected to win
- 23- Not knowing how break the other teams momentum
- 28- Certain maps you're not strong on

**PCA5) IGL-specific interactions** – problematic interactions with the IGL

- 5- Aggressive communication from IGL
- 9- Other players getting emotional
- 13- Negative/critical communication from IGL
- 22- Controlling communication from IGL

**PCA6) Game-specific uncertainty** -

- 14- Worry that teammates will be affected by 'trash-talk'
- 21- Negative comments about IGL decisions (teammates)
- 31- Uncertainty over (my own teams') decision-making
- 33- Organising practice and competition around other 'life' aspects
- 34-Trash talk from opposition when your team are losing/on-tilt
- 35-Concern about (your teammates) emotional stability

**PCA7) In-game pressure** – pressure that occurs within the game situation

- 12- Knowing you're the last player on your team in the round
- 7- Playing in the deciding round
- 19- When it gets close in a game

**Supplementary material S2: Table S2. Descriptive statistics****of outcome variables**

| Variable                                       | <i>M</i> | <i>SD</i> |
|------------------------------------------------|----------|-----------|
| Social phobia anxiety - fear                   | 14.92    | 6.69      |
| Social phobia anxiety - avoidance              | 7.65     | 3.79      |
| Social phobia anxiety - physiological symptoms | 11.51    | 5.28      |
| Burnout - reduced sense of accomplishment      | 14.06    | 2.79      |
| Burnout - exhaustion                           | 9.54     | 4.51      |
| Burnout - sport devaluation                    | 11.92    | 4.83      |
| Sleep - subjective sleep quality               | 2.21     | 0.75      |
| Sleep - latency                                | 1.87     | 1.14      |
| Sleep - duration                               | 0.67     | 0.88      |
| Sleep - efficiency                             | 0.60     | 0.97      |
| Sleep - disturbance                            | 1.08     | 1.11      |
| Sleep - medication                             | 0.36     | 0.77      |
| Sleep - daytime dysfunction                    | 1.59     | 0.76      |
| Distress screener                              | 7.27     | 2.47      |
| Severe depressive symptoms (PHQ9)              | 41.69    | 17.61     |
| General anxiety and depression (GHQ12)         | 26.49    | 5.16      |

*Note.* *M* = Mean; *SD* = Standard deviation
